# Supplementary material for: Particle anisotropy and crystalline phase transition in one-pot synthesis of nano-zirconia: a causal relationship
Source: Royal Society of Chemistry journal article supplement (doi:10.1039/c7ce01949a), 2017-12-15
Supplement: c7ce01949a1.pdf [file c7ce01949a1.pdf]

Supporting info

**Table 2.** Zirconia polymorphs crystalline domain sizes obtained by electron diffraction data Rietveld analysis. The estimated standard deviation on the last digit for each refined parameter were reported in parentheses.

| Sample           | Phase                               |                                       |               |               |
|------------------|-------------------------------------|---------------------------------------|---------------|---------------|
|                  | <i>Tetragonal (Isotropic model)</i> | <i>Monoclinic (anisotropic model)</i> |               |               |
|                  | <i>d (nm)</i>                       | <i>l (nm)</i>                         | <i>w (nm)</i> | <i>h (nm)</i> |
| <b>0.16 Z2.5</b> | 2.4 (0.2)                           | 2.6 (0.2)                             | 2.3 (0.2)     | 1.6 (0.2)     |
| <b>0.16 Z24</b>  | 2.3 (0.2)                           | 4.9 (0.4)                             | 3.2 (0.3)     | 2.1 (0.2)     |
| <b>0.5 Z2.5</b>  | 2.3 (0.2)                           | 4.8 (0.4)                             | 2.8 (0.3)     | 2.2 (0.2)     |
| <b>0.5 Z24</b>   | 2.5 (0.2)                           | 7.5 (0.5)                             | 4.8 (0.4)     | 3.7 (0.4)     |

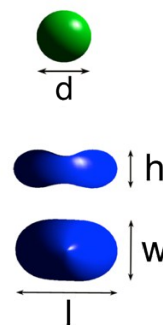

**Table 3.** Zirconia nanoparticles sizes obtained by bright field TEM image analysis.

| Sample           | <i>Pseudo-spherical particles (tetragonal)</i> |               |                 | <i>Elongated particles (monoclinic)</i> |               |                 |                  |               |                 |
|------------------|------------------------------------------------|---------------|-----------------|-----------------------------------------|---------------|-----------------|------------------|---------------|-----------------|
|                  | Size (nm)                                      | $\sigma$ (nm) | $\sigma_+$ (nm) | <i>Short axis</i>                       |               |                 | <i>Long axis</i> |               |                 |
|                  |                                                |               |                 | Size (nm)                               | $\sigma$ (nm) | $\sigma_+$ (nm) | Size (nm)        | $\sigma$ (nm) | $\sigma_+$ (nm) |
| <b>0.16 Z2.5</b> | 2.1                                            | 0.6           | 0.9             | -                                       | -             | -               | -                | -             | -               |
| <b>0.16 Z24</b>  | 2.4                                            | 0.5           | 0.9             | 2.9                                     | 0.8           | 1.3             | 4.6              | 1.3           | 1.8             |
| <b>0.5 Z2.5</b>  | 2.3                                            | 0.6           | 0.8             | 2.4                                     | 0.9           | 1.4             | 4.3              | 1.0           | 1.3             |
| <b>0.5 Z24</b>   | 2.4                                            | 0.7           | 0.9             | 3.7                                     | 0.7           | 0.9             | 7.7              | 1.4           | 2.0             |
